# Supplementary material for: Increasing the ferroelastic phase transition temperature of hybrid perovskites through a mixed phosphonium and ammonium cation strategy
Source: Royal Society of Chemistry journal article supplement (doi:10.1039/d2cc05823e), 2023-01-01
Supplement: d2cc05823e1.pdf [file d2cc05823e1.pdf]

# Increase ferroelastic phase transition temperature of hybrid perovskite through mixed phosphonium and ammonium cation strategy

Jie Mu, Ke Xu, Lei He, Yan Xu, Ti-Jian Yin, Jin-Tao Men and Qiong Ye\*

## EXPERIMENTAL SECTION

**Syntheses.** Trimethylpropylphosphonium bromide  $[(\text{CH}_3)_3\text{PCH}_2\text{CH}_2\text{CH}_3]\text{Br}$  was synthesized as follows: First, anhydrous dichloromethane was added to the three-necked flask. After filling with nitrogen for about 15 minutes, trimethylphosphine and 1-bromopropane were then added to the flask with a syringe and the reaction solution was heated to 40 °C with stirring under reflux 3 days. Excess solvent was removed by rotary evaporation under vacuum to obtain trimethylpropylphosphonium bromide. The product was a white solid powder in about 96.5% yield. The phase purity of  $[(\text{CH}_3)_3\text{PCH}_2\text{CH}_2\text{CH}_3]^+$  was confirmed by mass spectrometry (**Fig. S1**).

**Synthesis Method of  $[(\text{CH}_3)_3\text{PCH}_2\text{CH}_2\text{CH}_3]_2(n\text{-C}_4\text{H}_9\text{NH}_3)\text{Bi}_2\text{Br}_9$  (1).** Bismuth trioxide (2 mmol, 0.9320 g), trimethylpropylphosphonium bromide (2 mmol, 0.3982 g) and *n*-butylamine (2 mmol, 0.1463 g) were successively added to hydrobromic acid solvent (50 mL) and heated and stirred until dissolved. The mixed solution was then slowly evaporated on a heating stage at 45 °C. After fifteen days, light yellow transparent bulk crystals can be obtained from the solution.

## Measurement Methods.

**Phase Purity.** Powder X-ray diffraction (PXRD) pattern was recorded with the Ultima IV X-ray diffraction instrument in the  $2\theta$  range of 5-50° with a step size of 0.02°.

**DSC Measurements.** Differential scanning calorimetry (DSC) measurements for compound **1** were carried out on the PerkinElmer Diamond DSC instrument. Powder samples of **1** (14.8 mg) were exploited in a programmed temperature control process

in the temperature range of 270 to 400 K with a heating rate of 20 K min<sup>-1</sup> under nitrogen atmosphere.

**Single-Crystal X-ray Diffraction (SCXRD).** Variable-temperature single-crystal X-ray diffraction data of compound **1** were collected using Mo K $\alpha$  radiation ( $\lambda = 0.71073$  Å) at 273 and 363 K on a Rigaku Saturn 724 diffractometer. Cell parameters were retrieved and refined using *Crystal Clear* software package on all observed reflections. The crystal structures of compound **1** were solved by direct methods and refined by the full-matrix least-squares method based on  $F^2$  by means of the *SHELXLTL* software. All non-H atoms were refined anisotropically using all reflections for which  $I > 2\sigma(I)$ . Moreover, distances and angles between atoms were calculated by *SHELXLTL*.

**Dielectric Measurements.** The complex dielectric constant ( $\epsilon = \epsilon' - i\epsilon''$ , where  $\epsilon'$  is the real part, and  $\epsilon''$  is the imaginary part) of compound **1** was tested on a Tonghui TH2828A from 300 to 400 K at 1 MHz with an AC voltage of 1 V. Moreover, the pressed-powder sample painted with silver glue was taken as the electrode.

**Ultraviolet–visible (UV–vis) absorption spectrum.** The ultraviolet-visible spectrophotometry was recorded on a Shimadzu 2600 UV-Vis spectrophotometer at room temperature in a range of 200–800 nm, using BaSO<sub>4</sub> as a standard. The optical band gap ( $E_g$ ) of **1** was estimated by converting the reflectance data to absorbance by using the Kubelka–Munk equation<sup>1</sup>:

$$F(R) = (1-R)^2/2R \quad (1)$$

The  $E_g$  was calculated by using the variant of the Tauc equation<sup>2</sup>:

$$[h\nu \cdot F(R)]^{1/n} = A(h\nu - E_g) \quad (2),$$

$h$  = Planck's constant,  $\nu$  = frequency of vibration,  $A$  =proportional constant,  $F(R)$  is the Kubelka–Munk function, and exponent ' $n$ ' represents the nature of the sample's transition,  $n = 1/2$  for direct, and  $n = 2$  for indirect transition. The  $E_g$  can be found using a Tauc plot by plotting  $[h\nu \cdot F(R)]^{1/n}$  vs. the energy in electron volts.

**Optical Measurements.** The single-crystal sample with a thickness of approximately 1.0 mm was placed on an Instec HCC602 cooling/heating stage. The domains were observed under an Olympus BX51TRF optical polarizing microscope. Before observing the ferroelastic domains, the crystal needs to be heated to around 360 K (high temperature phase) and then cooled to room temperature for pretreatment.

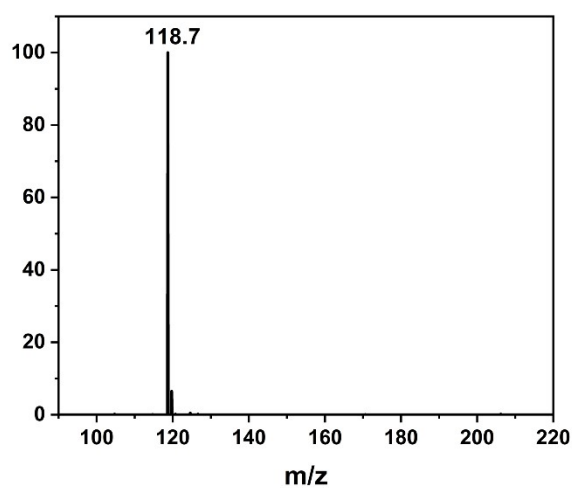

**Fig. S1** The mass spectrum of  $[(\text{CH}_3)_3\text{PCH}_2\text{CH}_2\text{CH}_3]^+$

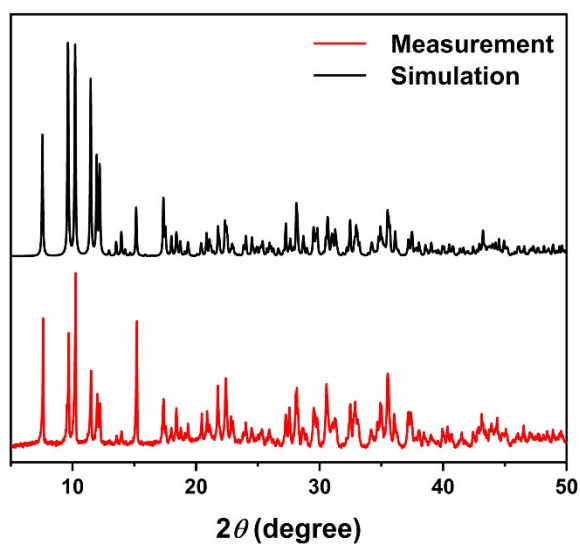

**Fig. S2** Powder X-ray diffraction patterns of compound **1** at room temperature.

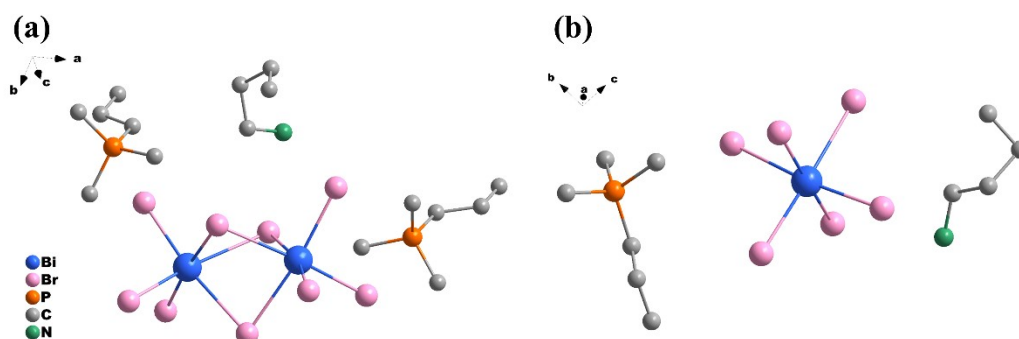

**Fig. S3** The asymmetric unit of **1** at 273 K (a) and 363 K (b).

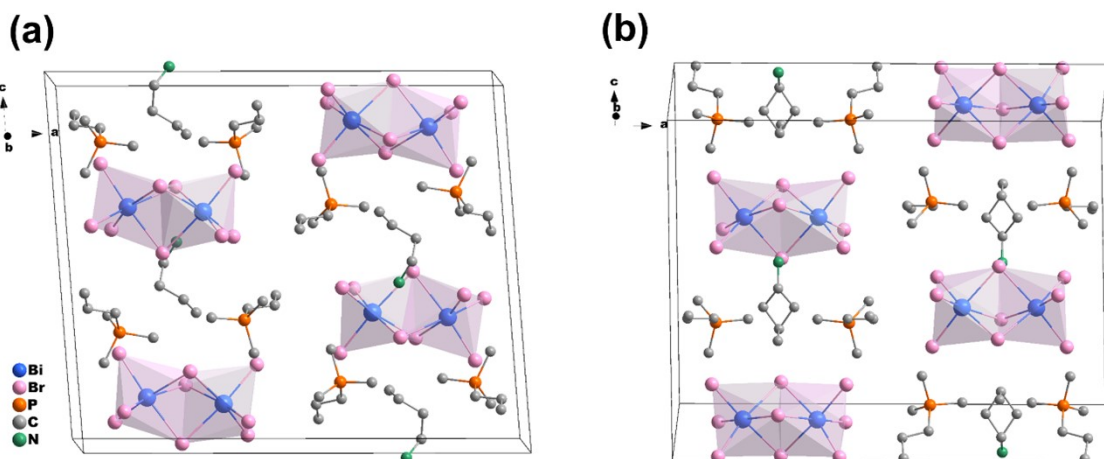

**Fig. S4** Packing structures for 1 at 273 K (a) and 363 K (b).

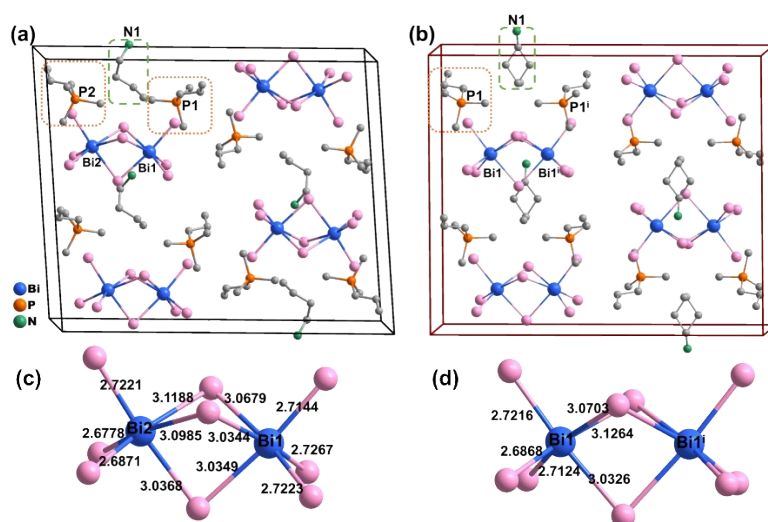

**Fig. S5** Comparison of the cell structure of 1 at 273 K (a) and 363 K (b), where the conformational changes and ordered-disordered changes of organic cations at high and low temperatures are marked with boxes. (c) shows the Bi-Br bond length of [Bi<sub>2</sub>Br<sub>9</sub>]<sup>3-</sup> anions in (a); (d) shows the Bi-Br bond length of [Bi<sub>2</sub>Br<sub>9</sub>]<sup>3-</sup> anions in (b).

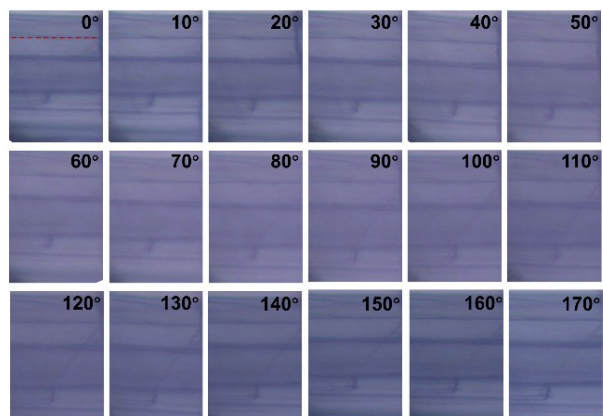

**Fig. S6** Polarized light microscope images of the crystal along different angles.

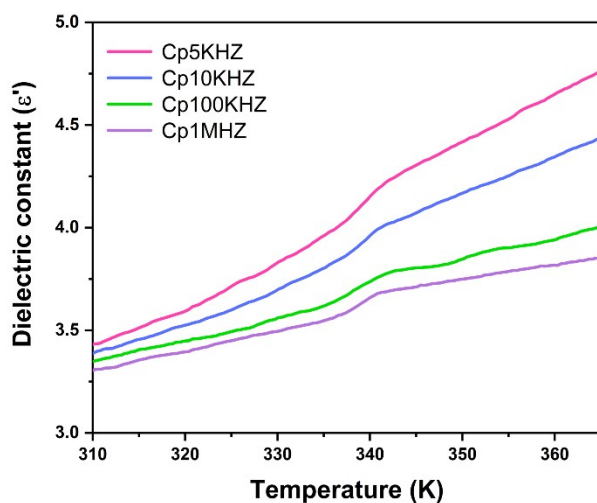

**Fig. S7** Dielectric constants of **1** at 5 kHz, 10 kHz, 100 kHz, and 1000 kHz upon heating.

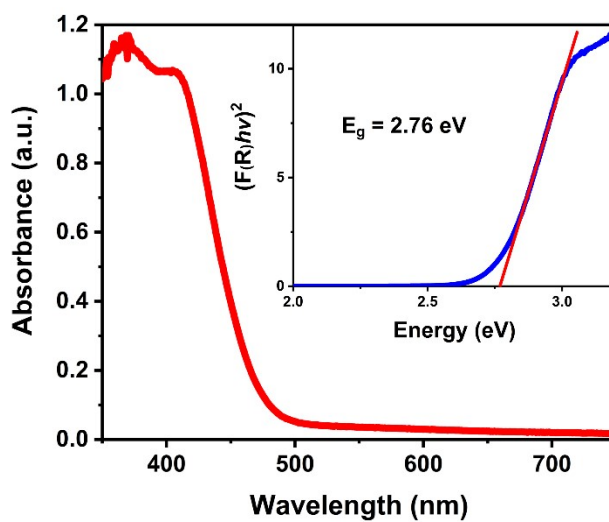

**Fig. S8** UV-Vis absorption spectrum of **1**.

**Table S1.** Crystal data and structure refinement details of complex **1**.

| Chemical Formula         | [(CH <sub>3</sub> ) <sub>3</sub> PCH <sub>2</sub> CH <sub>2</sub> CH <sub>3</sub> ] <sub>2</sub> ( <i>n</i> -C <sub>4</sub> H <sub>9</sub> NH <sub>3</sub> )[Bi <sub>2</sub> Br <sub>9</sub> ] |                       |
|--------------------------|------------------------------------------------------------------------------------------------------------------------------------------------------------------------------------------------|-----------------------|
| <i>T</i> (K)             | 273 K                                                                                                                                                                                          | 363 K                 |
| Formula weight           | 1449.61                                                                                                                                                                                        | 1449.61               |
| Crystal system           | Monoclinic                                                                                                                                                                                     | Orthorhombic          |
| Space group              | <i>P</i> 2 <sub>1</sub> / <i>c</i>                                                                                                                                                             | <i>P</i> <i>m c n</i> |
| <i>a</i> /Å              | 23.4595 (7)                                                                                                                                                                                    | 23.522 (2)            |
| <i>b</i> /Å              | 8.4198 (2)                                                                                                                                                                                     | 8.5667 (6)            |
| <i>c</i> /Å              | 19.3390 (6)                                                                                                                                                                                    | 19.7659 (13)          |
| $\alpha$ (deg)           | 90                                                                                                                                                                                             | 90                    |
| $\beta$ (deg)            | 94.700 (3)                                                                                                                                                                                     | 90                    |
| $\gamma$ (deg)           | 90                                                                                                                                                                                             | 90                    |
| <i>V</i> /Å <sup>3</sup> | 3807.08 (19)                                                                                                                                                                                   | 3982.9 (5)            |
| <i>Z</i>                 | 4                                                                                                                                                                                              | 4                     |
| <i>F</i> (000)           | 2632                                                                                                                                                                                           | 2456                  |
| GOF                      | 1.02                                                                                                                                                                                           | 1.10                  |
| <i>R</i> <sub>1</sub>    | 0.095                                                                                                                                                                                          | 0.110                 |
| <i>wR</i> <sub>2</sub>   | 0.228                                                                                                                                                                                          | 0.273                 |

**Table S2.** The bond lengths and angles at 273 K.

| Bond lengths (Å) |            | Bond angles (°) |            |
|------------------|------------|-----------------|------------|
| Bi1—Br1          | 2.7144 (7) | Br1—Bi1—Br3     | 94.12 (2)  |
| Bi1—Br3          | 2.7223 (8) | Br1—Bi1—Br2     | 93.44 (2)  |
| Bi1—Br2          | 2.7267 (9) | Br3—Bi1—Br2     | 96.37 (3)  |
| Bi1—Br6          | 3.0344 (7) | Br1—Bi1—Br6     | 92.09 (2)  |
| Bi1—Br5          | 3.0349 (7) | Br3—Bi1—Br6     | 88.70 (2)  |
| Bi1—Br4          | 3.0679 (8) | Br2—Bi1—Br6     | 172.21 (2) |
| Bi2—Br8          | 2.6778 (9) | Br1—Bi1—Br5     | 173.86 (2) |
| Bi2—Br9          | 2.6871 (8) | Br3—Bi1—Br5     | 89.25 (2)  |

|         |            |             |             |
|---------|------------|-------------|-------------|
| Bi2—Br7 | 2.7221 (8) | Br2—Bi1—Br5 | 91.27 (2)   |
| Bi2—Br5 | 3.0368 (7) | Br6—Bi1—Br5 | 82.853 (19) |
| Bi2—Br6 | 3.0985 (7) | Br1—Bi1—Br4 | 93.95 (2)   |
| Bi2—Br4 | 3.1188 (7) | Br3—Bi1—Br4 | 167.78 (2)  |
| P2—C9   | 1.769 (9)  | Br2—Bi1—Br4 | 92.29 (2)   |
| P2—C10  | 1.775 (7)  | Br6—Bi1—Br4 | 81.851 (19) |
| P2—C7   | 1.801 (8)  | Br5—Bi1—Br4 | 81.932 (19) |
| P2—C8   | 1.802 (7)  | Br8—Bi2—Br9 | 96.39 (3)   |
| P1—C3   | 1.756 (8)  | Br8—Bi2—Br7 | 92.40 (3)   |
| P1—C4   | 1.770 (8)  | Br9—Bi2—Br7 | 92.14 (3)   |
| P1—C2   | 1.775 (7)  | Br8—Bi2—Br5 | 93.15 (3)   |
| P1—C1   | 1.803 (8)  | Br9—Bi2—Br5 | 88.06 (2)   |
|         |            | Br7—Bi2—Br5 | 174.39 (2)  |
|         |            | Br8—Bi2—Br6 | 172.11 (3)  |
|         |            | Br9—Bi2—Br6 | 89.48 (2)   |
|         |            | Br7—Bi2—Br6 | 92.63 (2)   |
|         |            | Br5—Bi2—Br6 | 81.764 (19) |
|         |            | Br8—Bi2—Br4 | 93.28 (3)   |
|         |            | Br9—Bi2—Br4 | 165.83 (2)  |
|         |            | Br7—Bi2—Br4 | 97.79 (2)   |
|         |            | Br5—Bi2—Br4 | 81.072 (19) |
|         |            | Br6—Bi2—Br4 | 80.028 (18) |
|         |            | Bi1—Br6—Bi2 | 81.991 (17) |
|         |            | Bi1—Br5—Bi2 | 83.004 (18) |
|         |            | Bi1—Br4—Bi2 | 81.129 (17) |
|         |            | C9—P2—C10   | 108.5 (4)   |
|         |            | C9—P2—C7    | 111.8 (4)   |
|         |            | C10—P2—C7   | 110.4 (4)   |
|         |            | C9—P2—C8    | 108.5 (4)   |
|         |            | C10—P2—C8   | 109.2 (3)   |

|          |           |
|----------|-----------|
| C7—P2—C8 | 108.3 (4) |
| C3—P1—C4 | 110.7 (4) |
| C3—P1—C2 | 110.1 (4) |
| C4—P1—C2 | 107.1 (4) |
| C3—P1—C1 | 110.7 (4) |
| C4—P1—C1 | 109.1 (4) |
| C2—P1—C1 | 109.0 (4) |

**Table S3.** The bond lengths and angles at 363 K.

| <b>Bond lengths (Å)</b> |             | <b>Bond angles (°)</b>    |            |
|-------------------------|-------------|---------------------------|------------|
| Bi1—Br3                 | 2.6868 (14) | Br3—Bi1—Br2               | 95.59 (4)  |
| Bi1—Br2                 | 2.7124 (14) | Br3—Bi1—Br1               | 93.37 (4)  |
| Bi1—Br1                 | 2.7216 (11) | Br2—Bi1—Br1               | 92.99 (4)  |
| Bi1—Br5                 | 3.0326 (9)  | Br3—Bi1—Br5               | 90.28 (4)  |
| Bi1—Br6                 | 3.0703 (10) | Br2—Bi1—Br5               | 89.81 (4)  |
| Bi1—Br4                 | 3.1264 (10) | Br1—Bi1—Br5               | 175.16 (3) |
| Br6—Bi1 <sup>i</sup>    | 3.0703 (10) | Br3—Bi1—Br6               | 91.37 (4)  |
| Br5—Bi1 <sup>i</sup>    | 3.0326 (9)  | Br2—Bi1—Br6               | 170.77 (4) |
| Br4—Bi1 <sup>i</sup>    | 3.1263 (10) | Br1—Bi1—Br6               | 92.64 (3)  |
| P1—C1                   | 1.777 (10)  | Br5—Bi1—Br6               | 84.09 (3)  |
| P1—C4                   | 1.869 (10)  | Br3—Bi1—Br4               | 168.26 (3) |
| P1—C3                   | 1.774 (11)  | Br2—Bi1—Br4               | 91.70 (4)  |
| P1—C2                   | 1.788 (11)  | Br1—Bi1—Br4               | 95.43 (3)  |
|                         |             | Br5—Bi1—Br4               | 80.53 (3)  |
|                         |             | Br6—Bi1—Br4               | 80.49 (3)  |
|                         |             | Bi1 <sup>i</sup> —Br6—Bi1 | 81.98 (3)  |
|                         |             | Bi1 <sup>i</sup> —Br5—Bi1 | 83.22 (3)  |
|                         |             | Bi1 <sup>i</sup> —Br4—Bi1 | 80.21 (3)  |
|                         |             | C3—P1—C1                  | 109.6 (5)  |



---

|          |           |
|----------|-----------|
| C3—P1—C2 | 111.8 (5) |
| C1—P1—C2 | 104.2 (5) |
| C3—P1—C4 | 113.5 (4) |
| C1—P1—C4 | 113.7 (4) |
| C2—P1—C4 | 103.5 (4) |

---

Symmetry code: (i)  $-x+3/2, y, z$ .
